# Supplementary material for: Luminescent Papers with Asymmetric Complexes of Eu(III) and Tb(III) in Polymeric Matrices and Suggested Combinations for Color Tuning
Source: MDPI journal article supplement (doi:10.3390/molecules28166164), 2023-08-21
Supplement: s1 [file s1]

Supplementary File

# Luminescent Papers with Asymmetric Complexes of Eu(III) and Tb(III) in Polymeric Matrices, and Suggested Combinations for Color Tuning

Roberto J. Aguado <sup>1</sup>, Beatriz O. Gomes <sup>2</sup>, Luisa Durães <sup>3</sup>, Artur J.M. Valente <sup>2,\*</sup>

<sup>1</sup> LEPAMAP-PRODIS Research Group, University of Girona, M. Aurèlia Capmany 61, 17003 Girona, Spain

<sup>2</sup> University of Coimbra, CQC, Department of Chemistry, Rua Larga, 3004-535 Coimbra, Portugal

<sup>3</sup> University of Coimbra, CIEPQPF, Department of Chemical Engineering, Rua Sílvio Lima, 3030-790 Coimbra, Portugal

\* Correspondence: avalente@ci.uc.pt

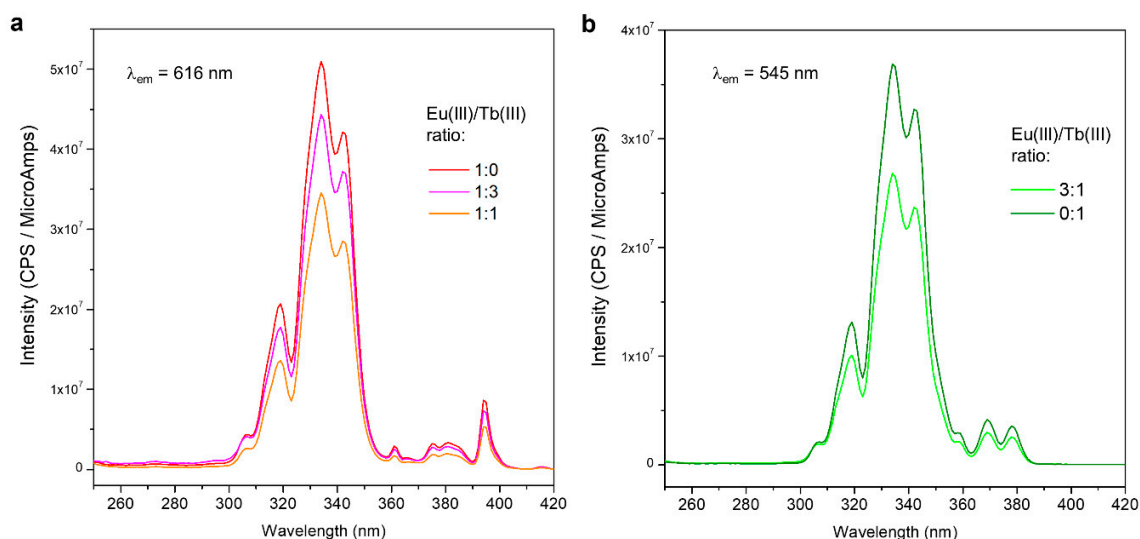

**Figure S1:** Excitation spectrum of Ln(III)/PSA/Phen, monitored either at 616 nm (a) or 545 nm (b).

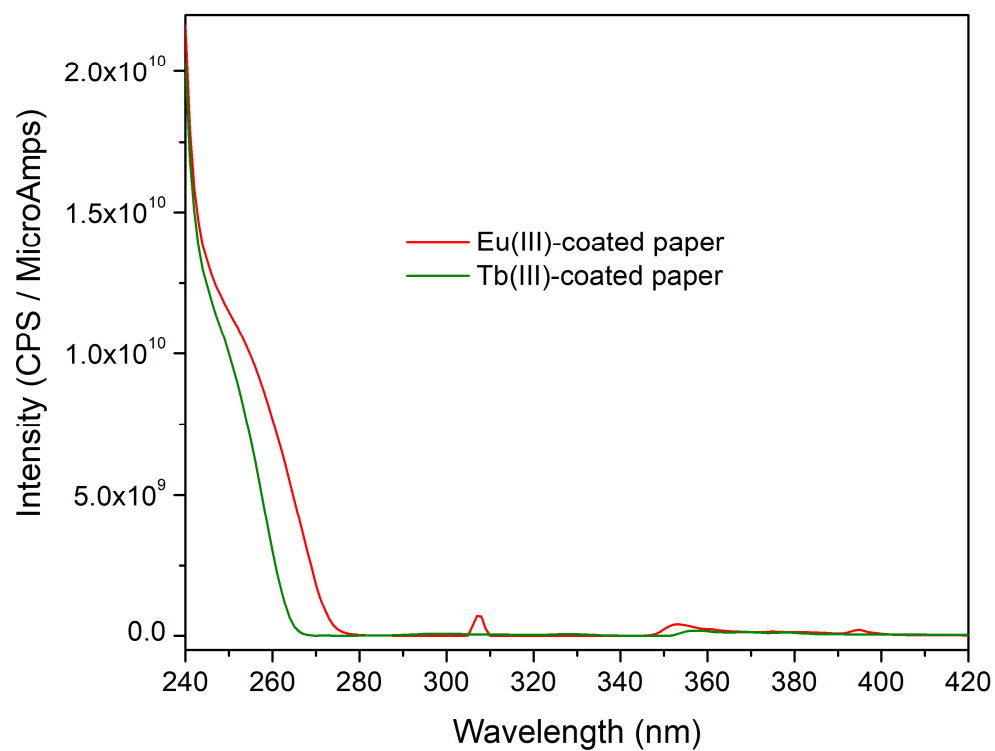

**Figure S2:** Excitation spectrum of Ln(III)-coated papers, monitored either at 616 nm (europium) or 545 nm (terbium)
